# Supplementary material for: Carbon-Supported Raney Nickel Catalyst for Acetone Hydrogenation with High Selectivity
Source: MDPI journal article supplement (doi:10.3390/molecules25040803), 2020-02-13
Supplement: s1 [file s1]

## Supplementary material

### Carbon-Supported Raney Nickel Catalyst for Acetone

### Hydrogenation with High Selectivity

Shuliang Lu<sup>a</sup>, Jiajia Wu<sup>a</sup>, Hui Peng<sup>a</sup>, and Yong Chen<sup>\*a</sup>

SINOPEC Beijing Research Institute of Chemical Industry, Beijing 100013,  
China.

#### 1. Details of Chemical Materials Used

All chemicals were bought from different companies and used as received. Specifically, Ni-Al alloy powder (48 wt.% Ni) and Al<sub>2</sub>O<sub>3</sub> were purchased from Innochem Ind. Co.; phenol formaldehyde resin (2123) was from Xinxiang Bomafengfan Company; and acetone (AR), hexamethylenetetramine (AR), and Ni(NO<sub>3</sub>)<sub>2</sub>•6H<sub>2</sub>O were from Tianjin Guangfu Technology Company.

#### 2. Characterization for Raney Ni/C and Ni/Al<sub>2</sub>O<sub>3</sub>

The Raman spectra were recorded on a LabRam HR 800 micro Raman spectrometer (Horiba Jobin Yvon) with 532nm radiation between 400cm<sup>-1</sup> and 3000cm<sup>-1</sup> with a resolution of 1cm<sup>-1</sup>. The surface morphologies and structures were observed on a scanning electron microscope (SEM) (S-4800, Hitachi, Japan) operated at 1kV. The Brunauer Emmett Teller (BET) specific area and pore volume were determined using Micromeritics ASAP 2020 physical adsorption apparatus at 77K. The temperature programmed desorption of NH<sub>3</sub> (NH<sub>3</sub>-TPD) studies were carried out in Micromeritics AutoChem II 2920 with a thermal conductivity detector (TCD).

#### 3. catalytic acetone hydrogenation experiment

20g acetone and 1g catalyst were added directly into a 50ml autoclave. Before the reaction, the autoclave was purged three times with H<sub>2</sub>, followed by pressurizing with H<sub>2</sub> to 3MPa. Then, the autoclave was heated at a specific temperature and stirred magnetically at about 400rpm. Samples (0.2mL for each) were taken out after 10h by a syringe with a microfiltration head. Each sample was analyzed by gas chromatography equipped with a flame ionization detector (GC-FID, Agilent 7890, equipped with a DB-WAX capillary column 30m × 0.32mm i.d. × 0.25μm film thickness) using an external standard method.
